# Supplementary material for: Generation of Human Breg-Like Phenotype with Regulatory Function In Vitro with Bacteria-Derived Oligodeoxynucleotides
Source: Int J Mol Sci. 2018 Jun 12;19(6):1737. doi: 10.3390/ijms19061737 (PMC6032322; doi:10.3390/ijms19061737)
Supplement: Supplementary file 1 [file ijms-19-01737-s001.pdf]

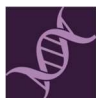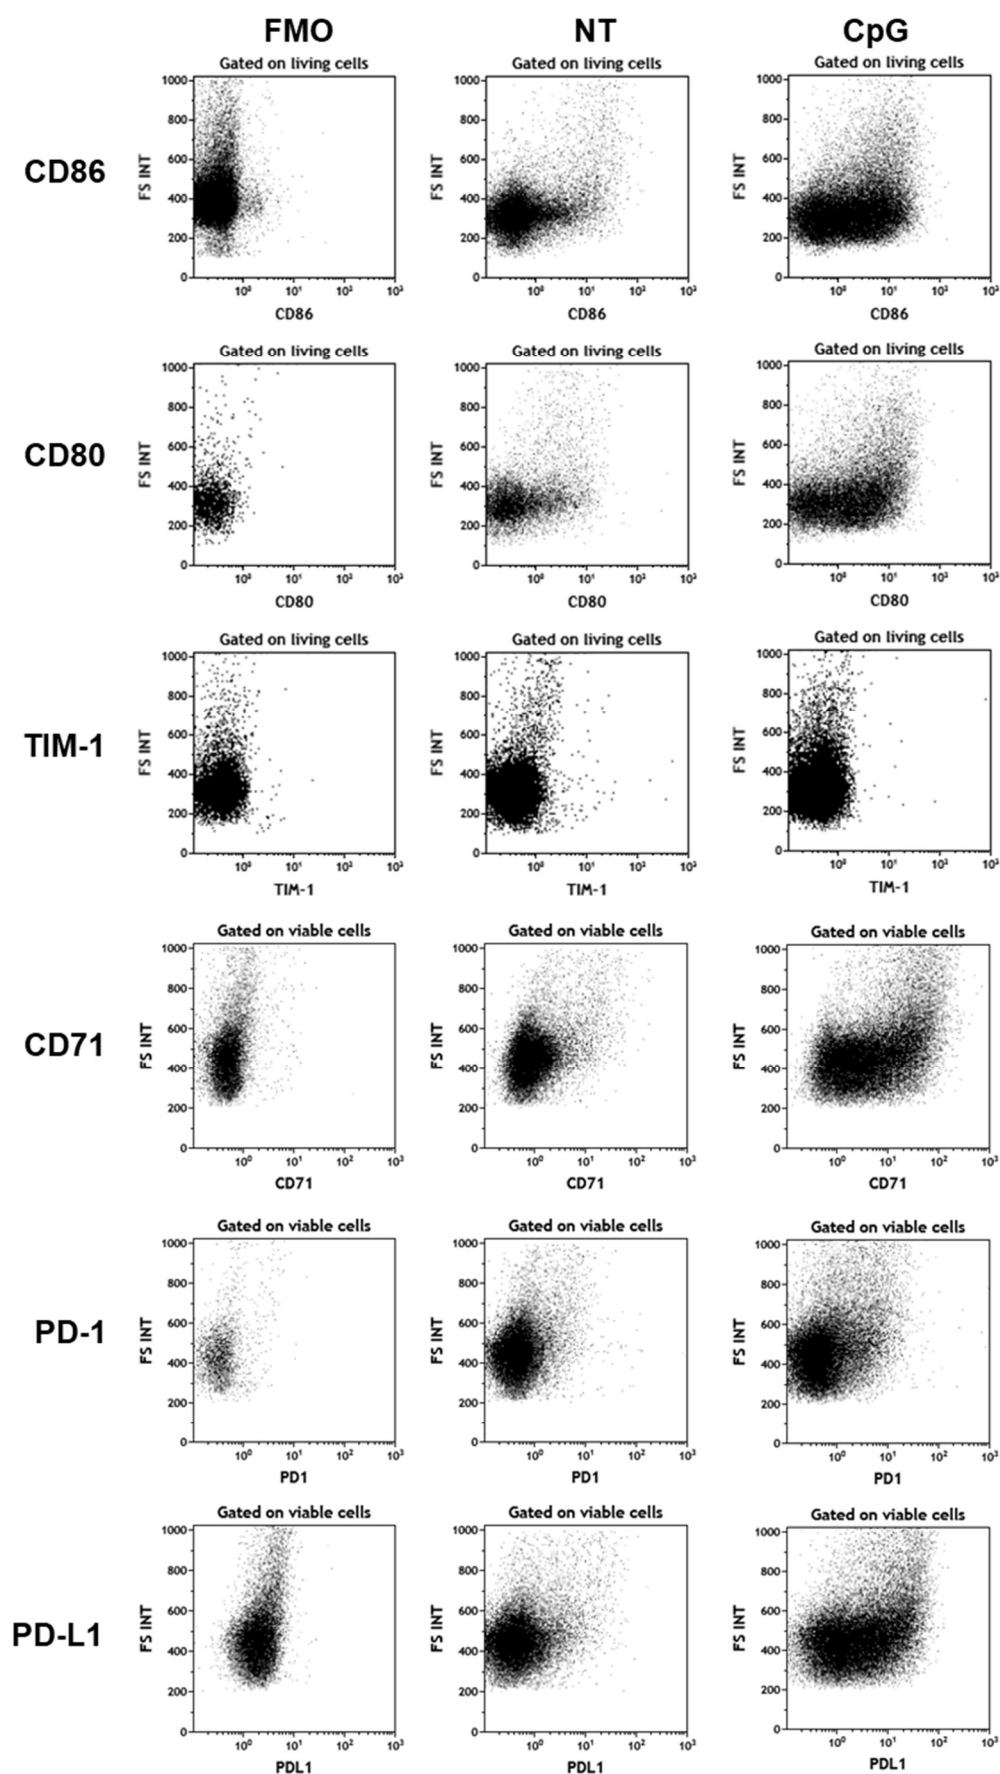

**Supplemental Figure S1. Phenotype of total B cells.** B cells were treated for 48h and analysed by flow cytometry. CD86, CD80, TIM-1, CD71, PD-1 and PD-L1 expression were analysed within viable cells using surface labelling in non-treated (NT) and CpG-treated B cells (dot plots). Dot plot of one representative experiment out of five is shown. FMO: fluorescence minus one.

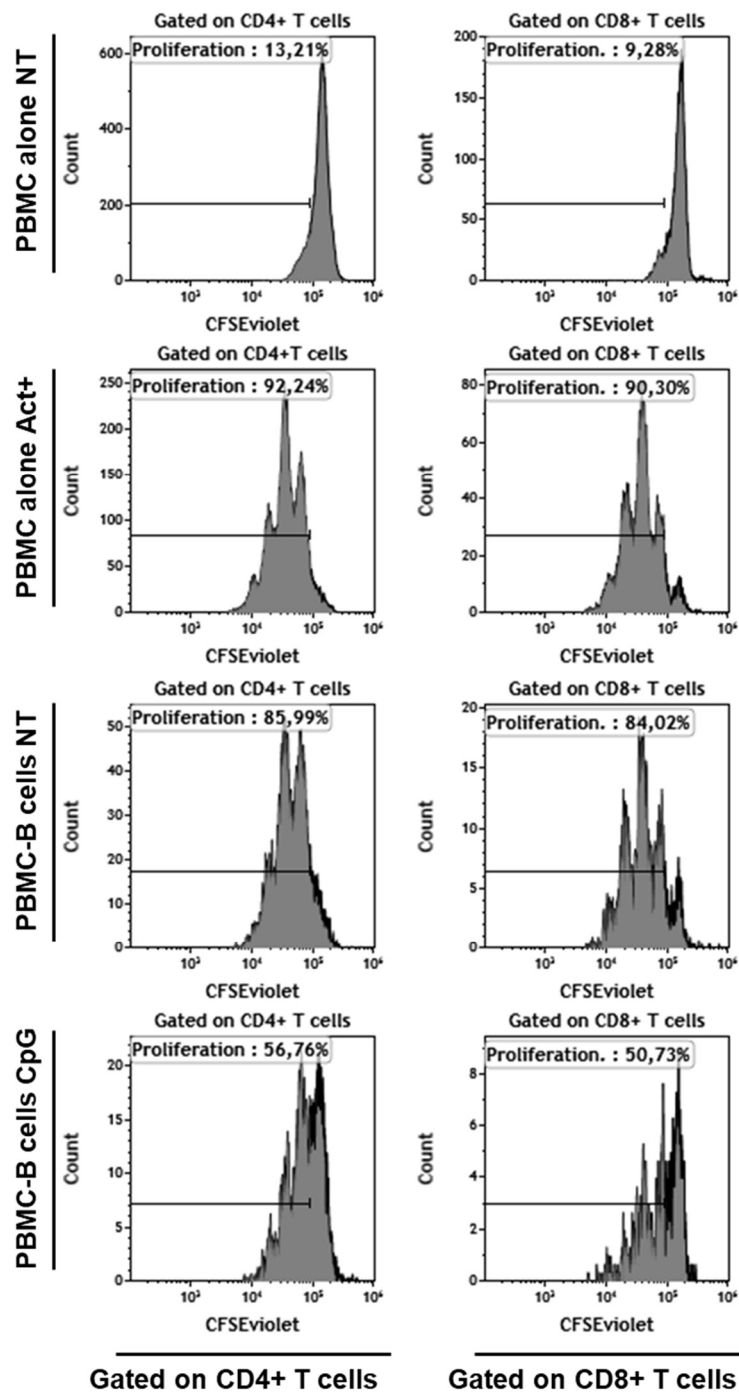

**Supplemental Figure S2. Inhibition of the CFSE<sup>+</sup>-PBMC proliferation experiment.** Histograms of CD4<sup>+</sup> and CD8<sup>+</sup> T-cell proliferation analysed by flow cytometry following the loss of CFSE fluorescence. One representative experiment out of 4 for autologous co-culture experiment is shown. Non-treated PBMCs (NT) alone and activated PBMCs (Act+) alone were used as controls of proliferation. Two co-culture conditions are shown: co-culture of activated PBMCs with NT B cells and co-culture of activated PBMCs with CpG-treated B cells. Numbers represent the percentages of proliferation for CD4<sup>+</sup> or CD8<sup>+</sup> T cells.

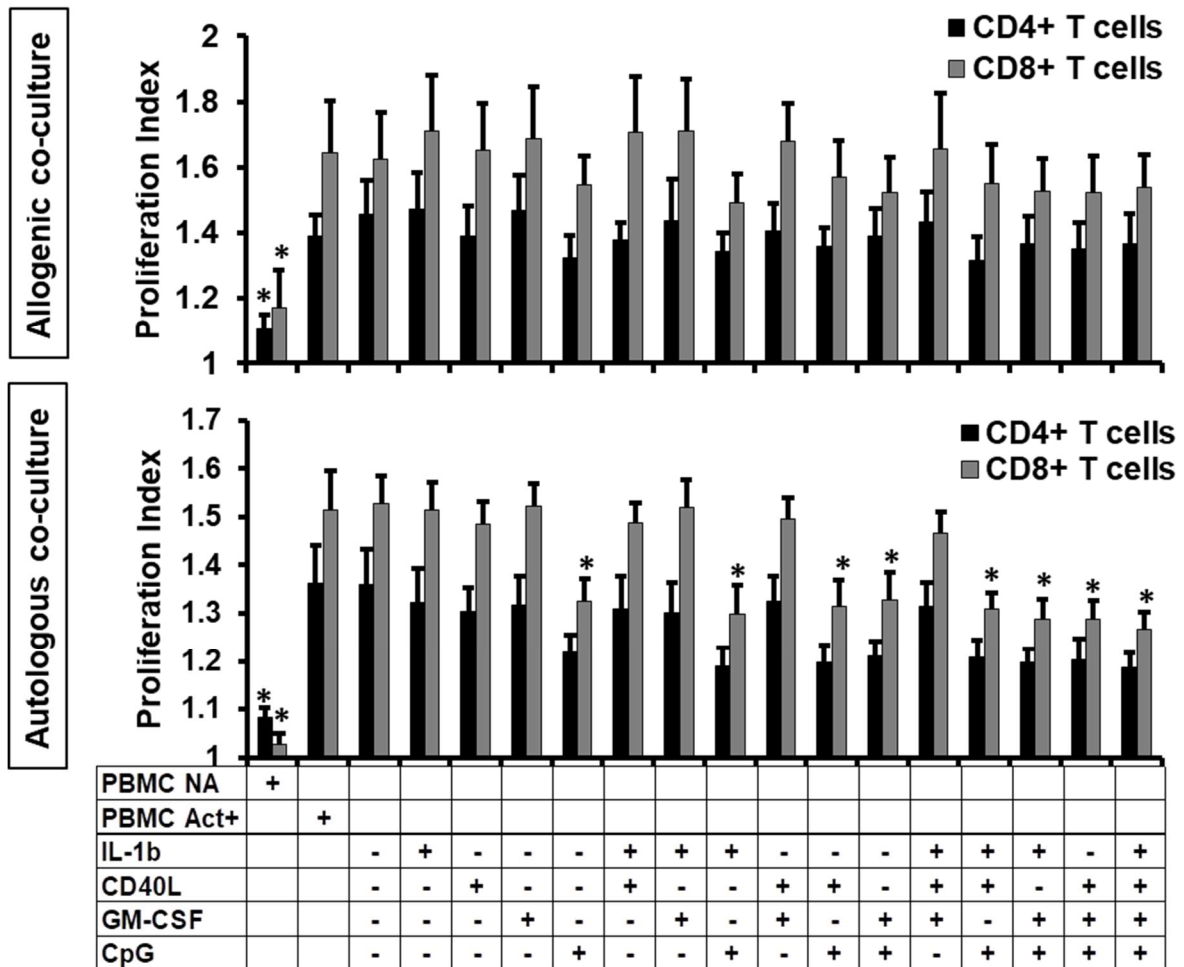

**Supplemental Figure 3. Proliferation index of the B-cell and PBMC co-culture.** Histograms of CD4<sup>+</sup> and CD8<sup>+</sup> T-cell proliferation index analysed by FlowJo-V10 software from flow cytometry data, following the loss of CFSE fluorescence. Proliferation Index corresponds to the fold expansion of the cells during culture (the ratio of final/starting cellular count). Average proliferation index after 3 days of co-culture with B cells either non-treated or treated with IL-1 $\beta$ , CD40L, GM-CSF or CpG alone or in combination for 2 days. Average + SEM of 4 experiments for autologous and allogenic conditions. \*= $p < 0.05$  when comparing non-treated condition versus treated condition.
